# Supplementary material for: Actigraphic patterns, impulsivity and mood instability in bipolar disorder, borderline personality disorder and healthy controls
Source: PubMed Central journal article supplement (PMC7216871; doi:10.1111/acps.13148), 2020-01-20
Supplement: ACPS-141-374-s001.pdf [file ACPS-141-374-s001.pdf]

# Supplementary Materials

## Acitgraphic patterns, impulsivity and mood instability in bipolar disorder, borderline personality disorder, and healthy controls

Niall M. McGowan <sup>1</sup>, PhD; Guy M. Goodwin <sup>1,2</sup>, FMedSci; Amy C. Bilderbeck <sup>1</sup>, DPhil; and Kate E. A. Saunders <sup>1,2,3</sup>, DPhil

### Author affiliations:

- 1 Department of Psychiatry, University of Oxford, Oxford, OX3 7JX, UK
- 2 Oxford Health NHS Foundation Trust, Warneford Hospital, Oxford, OX3 7JX, UK
- 3 NIHR Oxford Health Biomedical Research Centre, Oxford, OX3 7JX, UK

**Supplementary Table 1: Summary of demographic and clinical features of sample**

|                                             | <b>HC</b><br>( <i>n</i> = 35) | <b>BD</b><br>( <i>n</i> = 31) | <b>BPD</b><br>( <i>n</i> = 21) | <b><i>P</i></b>          | <b><i>Post-hoc</i></b>      |
|---------------------------------------------|-------------------------------|-------------------------------|--------------------------------|--------------------------|-----------------------------|
| <b>Sample Demographics</b>                  |                               |                               |                                |                          |                             |
| Gender, M:F                                 | 11:24                         | 10:21                         | 2:19                           | 0.130                    | <i>n.s.</i>                 |
| Age, yr (SD)                                | 39.46 (12.51)                 | 39.23 (12.24)                 | 34.14 (10.5)                   | 0.226                    | <i>n.s.</i>                 |
| Unemployed (N)                              | 5                             | 2                             | 11                             | <b><i>P</i>&lt;0.001</b> | BPD>HC,<br>BPD>BD           |
| <b>Clinical Features</b>                    |                               |                               |                                |                          |                             |
| Bipolar Diagnosis,<br>BD-I:BD-II            | -                             | 23:8                          | -                              | -                        | -                           |
| IPDE, mdn (IQR)                             | 0 (0.00)                      | 4 (6.25)                      | 16 (3.5)                       | <b><i>P</i>&lt;0.001</b> | BD>HC,<br>BPD>HC,<br>BPD>BD |
| ASRM, mdn (IQR)                             | 0.708 (2.6)                   | 1.5 (3.6)                     | 2.0 (3.53)                     | 0.075                    | <i>n.s.</i>                 |
| QIDS, mdn (IQR)                             | 2.0 (2.29)                    | 7.8 (6.0)                     | 13.67 (7.23)                   | <b><i>P</i>&lt;0.001</b> | BD>HC,<br>BPD>HC            |
| <b>Psychotropic medication use, No. (%)</b> | N/A                           | 30 (97)                       | 16 (76)                        | <b><i>P</i>=0.023</b>    | BD>BPD                      |
| Lithium                                     | -                             | 14                            | 0                              |                          |                             |
| Anticonvulsant                              | -                             | 6                             | 1                              |                          |                             |
| Antipsychotic                               | -                             | 22                            | 5                              |                          |                             |
| Antidepressant                              | -                             | 10                            | 16                             |                          |                             |
| Hypnotic                                    | -                             | 2                             | 1                              |                          |                             |
| Anxiolytic                                  | -                             | 3                             | 5                              |                          |                             |

HC healthy control, BD bipolar disorder (BD-I, bipolar type I; BD-II, bipolar type II), BPD borderline personality disorder, ASRM Altman Self-Report Mania Scale, IPDE International Personality Disorder Examination module, QIDS Quick Inventory of Depressive Symptomatology. Significant values at  $P < 0.05$  are in bold. *n.s.* indicates non-significant for post-hoc tests. SD standard deviation, IQR interquartile range.

**Supplementary Table 2: Summary of BIS-11 and MZ data**

|                                     | <b>HC</b>    | <b>BD</b>     | <b>BPD</b>    | <b><i>P</i></b>          | <b><i>Post-hoc</i></b>   |
|-------------------------------------|--------------|---------------|---------------|--------------------------|--------------------------|
| <b>BIS-11</b>                       |              |               |               |                          |                          |
| BIS-11 (Total)                      | 52.53 (8.74) | 70.07 (12.02) | 75.33 (15.56) | <b><i>P</i>&lt;0.001</b> | BD>HC; BPD>HC            |
| BIS-11 (Attention)                  | 12.62 (3.2)  | 18.7 (4.2)    | 20.86 (3.85)  | <b><i>P</i>&lt;0.001</b> | BD>HC; BPD>HC            |
| BIS-11 (Motor)                      | 20.56 (3.36) | 25.4 (5.45)   | 26.48 (7.38)  | <b><i>P</i>&lt;0.001</b> | BD>HC; BPD>HC            |
| BIS-11 (Non-Planning)               | 19.35 (4.04) | 25.97 (5.39)  | 28 (6.95)     | <b><i>P</i>&lt;0.001</b> | BD>HC; BPD>HC            |
| <b>Mood Zoom</b>                    |              |               |               |                          |                          |
| Monitoring period, days mean (SD)   | 383 (238)    | 479 (285)     | 430 (226)     | 0.266                    | <i>n.s.</i>              |
| Negative PCA <sub>RMSSD</sub> (SD)  | 1.05 (0.67)  | 1.65 (0.79)   | 2.41 (0.8)    | <b><i>P</i>&lt;0.001</b> | BD>HC; BPD>HC;<br>BPD>BD |
| Positive PCA <sub>RMSSD</sub> (SD)  | 1.05 (0.54)  | 1.27 (0.54)   | 1.71 (0.54)   | <b><i>P</i>&lt;0.001</b> | BPD>HC; BPD>BD           |
| Irritable PCA <sub>RMSSD</sub> (SD) | 0.68 (0.41)  | 1.07 (0.42)   | 1.45 (0.49)   | <b><i>P</i>&lt;0.001</b> | BD>HC; BPD>HC;<br>BPD>BD |

HC healthy control, BD bipolar disorder, BPD borderline personality disorder, BIS-11 Barratt's Impulsiveness Scale, SD standard deviation, RMSSD root mean of square of successive differences. Significant values at  $P < 0.05$  are in bold. *n.s.* indicates non-significant for post-hoc tests.

Supplementary Table 3. NPCRA parameter bivariate correlations with impulsivity and mood instability

|                          | HC       |                         |                     |                         | BD       |                         |                     |                         | BPD           |                         |                     |                         |
|--------------------------|----------|-------------------------|---------------------|-------------------------|----------|-------------------------|---------------------|-------------------------|---------------|-------------------------|---------------------|-------------------------|
|                          | BIS-11   |                         | MZ <sub>RMSSD</sub> |                         | BIS-11   |                         | MZ <sub>RMSSD</sub> |                         | BIS-11        |                         | MZ <sub>RMSSD</sub> |                         |
|                          | <i>R</i> | <i>P<sub>adj.</sub></i> | <i>R</i>            | <i>P<sub>adj.</sub></i> | <i>R</i> | <i>P<sub>adj.</sub></i> | <i>R</i>            | <i>P<sub>adj.</sub></i> | <i>R</i>      | <i>P<sub>adj.</sub></i> | <i>R</i>            | <i>P<sub>adj.</sub></i> |
| <b>IS</b>                | 0.155    | 0.547                   | -0.069              | 0.759                   | 0.022    | 0.981                   | 0.098               | 0.801                   | <b>-0.67</b>  | <b>0.006</b>            | <b>-0.755</b>       | <b>0.001</b>            |
| <b>IV</b>                | -0.068   | 0.706                   | 0.085               | 0.759                   | 0.045    | 0.981                   | -0.139              | 0.801                   | 0.367         | 0.173                   | <b>0.539</b>        | <b>0.024</b>            |
| <b>RA</b>                | 0.359    | 0.240                   | -0.14               | 0.759                   | -0.168   | 0.684                   | -0.373              | 0.468                   | <b>-0.606</b> | <b>0.016</b>            | <b>-0.671</b>       | <b>0.006</b>            |
| <b>L5 onset</b>          | 0.237    | 0.547                   | -0.028              | 0.874                   | 0.296    | 0.684                   | 0.128               | 0.801                   | 0.419         | 0.142                   | 0.361               | 0.118                   |
| <b>M10 onset</b>         | -0.132   | 0.547                   | 0.084               | 0.759                   | -0.16    | 0.684                   | -0.044              | 0.890                   | 0.372         | 0.173                   | 0.416               | 0.080                   |
| <b>L5 activity</b>       | -0.187   | 0.547                   | 0.197               | 0.759                   | 0.187    | 0.684                   | 0.264               | 0.608                   | 0.233         | 0.371                   | <b>0.568</b>        | <b>0.021</b>            |
| <b>M10 activity</b>      | 0.141    | 0.547                   | 0.084               | 0.759                   | -0.004   | 0.981                   | -0.104              | 0.801                   | -0.288        | 0.273                   | 0.177               | 0.442                   |
| <b>L5 onset (SD)</b>     | -0.168   | 0.547                   | 0.329               | 0.684                   | 0.175    | 0.684                   | -0.022              | 0.908                   | 0.452         | 0.120                   | <b>0.572</b>        | <b>0.021</b>            |
| <b>M10 onset (SD)</b>    | -0.254   | 0.547                   | 0.161               | 0.759                   | 0.283    | 0.684                   | 0.159               | 0.801                   | 0.146         | 0.527                   | <b>0.492</b>        | <b>0.034</b>            |
| <b>L5 activity (SD)</b>  | -0.152   | 0.547                   | 0.086               | 0.759                   | -0.042   | 0.981                   | 0.05                | 0.890                   | <b>0.706</b>  | <b>0.0004</b>           | <b>0.547</b>        | <b>0.024</b>            |
| <b>M10 activity (SD)</b> | -0.121   | 0.547                   | 0.164               | 0.759                   | -0.12    | 0.791                   | -0.274              | 0.608                   | 0.177         | 0.482                   | <b>0.529</b>        | <b>0.024</b>            |
| <b>RA (SD)</b>           | -0.374   | 0.240                   | 0.169               | 0.759                   | 0.172    | 0.684                   | 0.109               | 0.801                   | 0.304         | 0.270                   | 0.406               | 0.080                   |

Bivariate correlations between actigraph measure and symptoms assessed by BIS-11 and RMSSD of Mood Zoom diary entries. Significance testing performed using the False Discovery Rate to control for family-wise error (Benjamini Hochberg method) and are reported as significant a  $P < 0.05$  (indicated in bold).

Supplementary Table 4. NPCRA parameter partial correlations with impulsivity and mood instability

|                          | HC       |                         |                     |                         | BD       |                         |                     |                         | BPD           |                         |                     |                         |
|--------------------------|----------|-------------------------|---------------------|-------------------------|----------|-------------------------|---------------------|-------------------------|---------------|-------------------------|---------------------|-------------------------|
|                          | BIS-11   |                         | MZ <sub>RMSSD</sub> |                         | BIS-11   |                         | MZ <sub>RMSSD</sub> |                         | BIS-11        |                         | MZ <sub>RMSSD</sub> |                         |
|                          | <i>R</i> | <i>P<sub>adj.</sub></i> | <i>R</i>            | <i>P<sub>adj.</sub></i> | <i>R</i> | <i>P<sub>adj.</sub></i> | <i>R</i>            | <i>P<sub>adj.</sub></i> | <i>R</i>      | <i>P<sub>adj.</sub></i> | <i>R</i>            | <i>P<sub>adj.</sub></i> |
| <b>IS</b>                | 0.175    | 0.574                   | -0.108              | 0.679                   | 0.013    | 0.948                   | 0.113               | 0.839                   | <b>-0.663</b> | <b>0.012</b>            | <b>-0.773</b>       | <b>0.001</b>            |
| <b>IV</b>                | -0.096   | 0.607                   | 0.156               | 0.677                   | 0.031    | 0.948                   | -0.157              | 0.839                   | 0.331         | 0.285                   | <b>0.662</b>        | <b>0.008</b>            |
| <b>RA</b>                | 0.369    | 0.258                   | -0.162              | 0.677                   | -0.192   | 0.710                   | -0.344              | 0.804                   | <b>-0.616</b> | <b>0.020</b>            | <b>-0.694</b>       | <b>0.006</b>            |
| <b>L5 onset</b>          | 0.247    | 0.540                   | -0.04               | 0.905                   | 0.313    | 0.710                   | 0.084               | 0.839                   | 0.403         | 0.174                   | 0.357               | 0.160                   |
| <b>M10 onset</b>         | -0.113   | 0.596                   | 0.004               | 0.982                   | -0.142   | 0.732                   | -0.066              | 0.839                   | 0.539         | 0.051                   | <b>0.553</b>        | <b>0.028</b>            |
| <b>L5 activity</b>       | -0.204   | 0.547                   | 0.256               | 0.677                   | 0.187    | 0.710                   | 0.222               | 0.839                   | 0.269         | 0.318                   | <b>0.560</b>        | <b>0.028</b>            |
| <b>M10 activity</b>      | 0.139    | 0.547                   | 0.105               | 0.679                   | -0.031   | 0.948                   | -0.098              | 0.839                   | -0.282        | 0.318                   | 0.098               | 0.689                   |
| <b>L5 onset (SD)</b>     | -0.144   | 0.547                   | 0.249               | 0.677                   | 0.234    | 0.710                   | -0.057              | 0.839                   | 0.462         | 0.110                   | <b>0.607</b>        | <b>0.018</b>            |
| <b>M10 onset (SD)</b>    | -0.258   | 0.540                   | 0.182               | 0.677                   | 0.278    | 0.710                   | 0.12                | 0.839                   | 0.16          | 0.559                   | 0.457               | 0.065                   |
| <b>L5 activity (SD)</b>  | -0.195   | 0.547                   | 0.211               | 0.677                   | -0.032   | 0.948                   | 0.022               | 0.839                   | <b>0.703</b>  | <b>0.012</b>            | <b>0.525</b>        | <b>0.036</b>            |
| <b>M10 activity (SD)</b> | -0.139   | 0.547                   | 0.21                | 0.667                   | -0.137   | 0.732                   | -0.269              | 0.839                   | 0.143         | 0.559                   | 0.458               | 0.065                   |
| <b>RA (SD)</b>           | -0.365   | 0.258                   | 0.136               | 0.679                   | 0.181    | 0.710                   | 0.062               | 0.839                   | 0.315         | 0.285                   | 0.290               | 0.250                   |

Partial correlations with gender and employment status inserted as covariates. Significance testing performed using the False Discovery Rate to control for family-wise error (Benjamini Hochberg method) and are reported as significant a  $P < 0.05$  (indicated in bold).

Supplementary Table 5. Group-wise comparison of partial correlation coefficients

|                   | HC vs BD |                   |                     |                   | HC vs BPD    |                   |                     |                   | BD vs BPD   |                   |                     |                   |
|-------------------|----------|-------------------|---------------------|-------------------|--------------|-------------------|---------------------|-------------------|-------------|-------------------|---------------------|-------------------|
|                   | BIS-11   |                   | MZ <sub>RMSSD</sub> |                   | BIS-11       |                   | MZ <sub>RMSSD</sub> |                   | BIS-11      |                   | MZ <sub>RMSSD</sub> |                   |
|                   | Z        | P <sub>adj.</sub> | Z                   | P <sub>adj.</sub> | Z            | P <sub>adj.</sub> | Z                   | P <sub>adj.</sub> | Z           | P <sub>adj.</sub> | Z                   | P <sub>adj.</sub> |
| IS                | 0.63     | 0.7489            | -0.85               | 0.7353            | <b>3.29</b>  | <b>0.004</b>      | <b>3.1</b>          | <b>0.0096</b>     | <b>2.68</b> | <b>0.0444</b>     | <b>3.78</b>         | <b>0.0024</b>     |
| IV                | -0.49    | 0.7489            | 1.21                | 0.7353            | -1.49        | 0.1634            | -2.16               | 0.0739            | -1.04       | 0.4475            | <b>-3.16</b>        | <b>0.0064</b>     |
| RA                | 2.36     | 0.2196            | 0.29                | 0.8181            | <b>4.1</b>   | <b>0.0005</b>     | <b>2.7</b>          | <b>0.0207</b>     | 1.98        | 0.1431            | <b>2.4</b>          | <b>0.0322</b>     |
| L5 onset          | -0.27    | 0.7872            | -0.48               | 0.8181            | -0.59        | 0.6057            | -1.4                | 0.2423            | -0.34       | 0.7339            | -0.96               | 0.3677            |
| M10 onset         | 0.31     | 0.7872            | 0.69                | 0.7353            | <b>-2.15</b> | <b>0.0474</b>     | -1.96               | 0.0856            | -2.37       | 0.0712            | <b>-2.52</b>        | <b>0.0281</b>     |
| L5 activity       | -1.22    | 0.5340            | -0.71               | 0.7353            | <b>-2.32</b> | <b>0.0348</b>     | <b>-3.03</b>        | <b>0.0096</b>     | -1.22       | 0.4450            | <b>-2.35</b>        | <b>0.0322</b>     |
| M10 activity      | 1.25     | 0.5340            | 0.27                | 0.8181            | <b>2.93</b>  | <b>0.0102</b>     | 0.97                | 0.3472            | 1.8         | 0.1726            | 0.72                | 0.4752            |
| L5 onset (SD)     | -1.7     | 0.5340            | 0.23                | 0.8181            | <b>-2.6</b>  | <b>0.0223</b>     | <b>-3.08</b>        | <b>0.0096</b>     | -1.08       | 0.4475            | <b>-3.22</b>        | <b>0.0064</b>     |
| M10 onset (SD)    | -0.63    | 0.7489            | 0.74                | 0.7353            | <b>-3.61</b> | <b>0.0018</b>     | -1.25               | 0.2817            | <b>-3.0</b> | <b>0.0324</b>     | -1.86               | 0.0944            |
| L5 activity (SD)  | -1.27    | 0.5340            | -0.85               | 0.7353            | -1.97        | 0.0651            | -2.03               | 0.0848            | -0.83       | 0.4878            | -1.25               | 0.2536            |
| M10 activity (SD) | 0.49     | 0.7489            | 1.94                | 0.6288            | -0.41        | 0.6818            | -0.94               | 0.3472            | -0.83       | 0.4878            | <b>-2.6</b>         | <b>0.0279</b>     |
| RA (SD)           | -0.7     | 0.7489            | 0.84                | 0.7353            | <b>-2.5</b>  | <b>0.0248</b>     | -0.96               | 0.3472            | -0.66       | 0.5556            | -1.67               | 0.1265            |

Table shows Fisher Z-transformation analysis comparing the coefficients of partial correlations between rest-activity pattern parameters and symptoms between groups. P-values are adjusted using the False Discovery Rate (Benjamini Hochberg method) and are reported as significant a P<0.05 (indicated in bold).

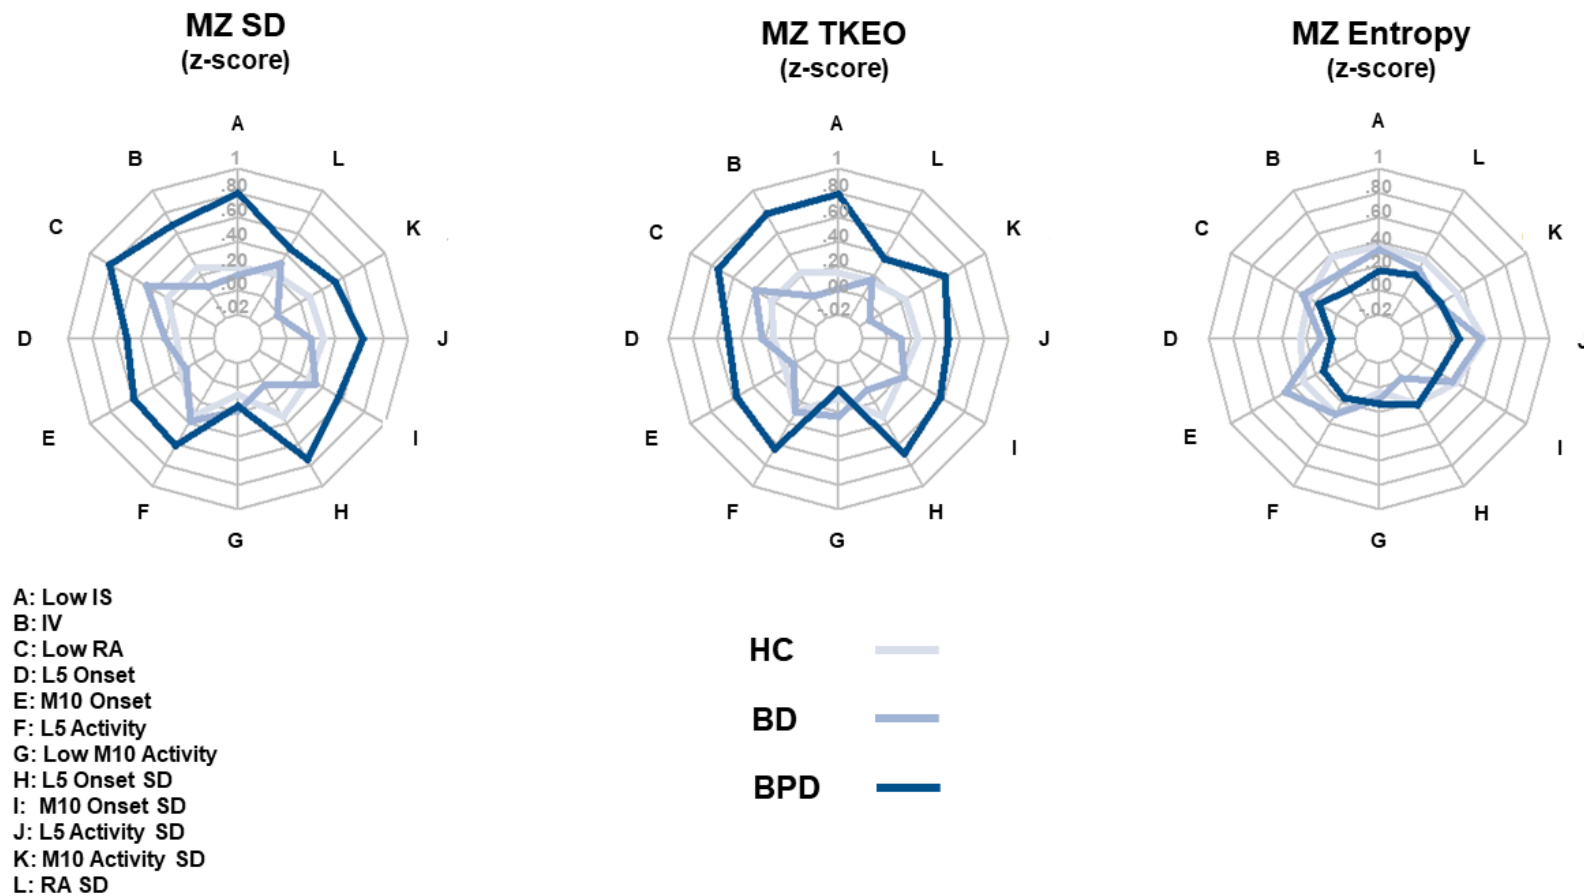

**Supplementary Figure 1: Correlation between sleep/circadian rhythm parameters and MZ variability using SD, TKEO and Shannon entropy**

Radar plots indicate partial correlation coefficient strength between rest-activity pattern variables and mood instability quantified using standard deviation (SD), Teager-Kaiser energy operator (TKEO) and Shannon entropy. Negative correlations (e.g. for Interdaily stability, relative amplitude, and M10 activity) were reversed and renamed for visual consistency such that higher values uniformly indicate stronger association.

**Supplementary Table 6: MZ variability (SD) and NPCRA variables**

|                   | HC       |                         | BD       |                         | BPD           |                         |
|-------------------|----------|-------------------------|----------|-------------------------|---------------|-------------------------|
|                   | <i>R</i> | <i>P<sub>adj.</sub></i> | <i>R</i> | <i>P<sub>adj.</sub></i> | <i>R</i>      | <i>P<sub>adj.</sub></i> |
| IS                | -0.051   | 0.881                   | 0.024    | 0.900                   | <b>-0.769</b> | <b>0.00072</b>          |
| IV                | 0.148    | 0.721                   | -0.059   | 0.832                   | <b>0.628</b>  | <b>0.0119</b>           |
| RA                | -0.147   | 0.721                   | -0.378   | 0.519                   | <b>-0.781</b> | <b>0.00072</b>          |
| L5 onset          | -0.045   | 0.881                   | 0.065    | 0.832                   | 0.424         | 0.0842                  |
| M10 onset         | -0.005   | 0.975                   | -0.059   | 0.832                   | <b>0.516</b>  | <b>0.0408</b>           |
| L5 activity       | 0.231    | 0.721                   | 0.273    | 0.774                   | <b>0.548</b>  | <b>0.0304</b>           |
| M10 activity      | 0.097    | 0.881                   | -0.059   | 0.832                   | -0.016        | 0.947                   |
| L5 onset (SD)     | 0.230    | 0.721                   | -0.116   | 0.832                   | <b>0.700</b>  | <b>0.0034</b>           |
| M10 onset (SD)    | 0.154    | 0.721                   | 0.230    | 0.774                   | 0.486         | 0.0521                  |
| L5 activity (SD)  | 0.191    | 0.721                   | 0.072    | 0.832                   | <b>0.564</b>  | <b>0.0285</b>           |
| M10 activity (SD) | 0.169    | 0.721                   | -0.190   | 0.774                   | 0.442         | 0.0771                  |
| RA (SD)           | 0.079    | 0.881                   | 0.195    | 0.774                   | 0.370         | 0.1298                  |

Legend as in Supplementary Table 4

**Supplementary Table 7: MZ variability (TKEO) and NPCRA variables**

|                   | HC       |                         | BD       |                         | BPD           |                         |
|-------------------|----------|-------------------------|----------|-------------------------|---------------|-------------------------|
|                   | <i>R</i> | <i>P<sub>adj.</sub></i> | <i>R</i> | <i>P<sub>adj.</sub></i> | <i>R</i>      | <i>P<sub>adj.</sub></i> |
| IS                | -0.001   | 0.998                   | 0.158    | 0.849                   | <b>-0.757</b> | <b>0.0016</b>           |
| IV                | 0.095    | 0.998                   | -0.163   | 0.849                   | <b>0.744</b>  | <b>0.0016</b>           |
| RA                | -0.101   | 0.998                   | -0.287   | 0.828                   | <b>-0.702</b> | <b>0.0032</b>           |
| L5 onset          | -0.013   | 0.998                   | 0.092    | 0.849                   | 0.418         | 0.0899                  |
| M10 onset         | -0.052   | 0.998                   | -0.141   | 0.849                   | 0.487         | 0.0515                  |
| L5 activity       | 0.180    | 0.998                   | 0.177    | 0.849                   | <b>0.587</b>  | <b>0.0199</b>           |
| M10 activity      | 0.062    | 0.998                   | -0.113   | 0.849                   | 0.143         | 0.5603                  |
| L5 onset (SD)     | 0.224    | 0.998                   | -0.063   | 0.849                   | <b>0.633</b>  | <b>0.0108</b>           |
| M10 onset (SD)    | 0.081    | 0.998                   | 0.096    | 0.849                   | <b>0.501</b>  | <b>0.0498</b>           |
| L5 activity (SD)  | 0.132    | 0.998                   | -0.034   | 0.916                   | 0.424         | 0.0898                  |
| M10 activity (SD) | 0.112    | 0.998                   | -0.282   | 0.828                   | <b>0.555</b>  | <b>0.0273</b>           |
| RA (SD)           | 0.006    | 0.998                   | 0.021    | 0.916                   | 0.255         | 0.3182                  |

Legend as in Supplementary Table 4

**Supplementary Table 8: MZ variability (Entropy) and NPCRA variables**

|                   | HC       |                         | BD       |                         | BPD      |                         |
|-------------------|----------|-------------------------|----------|-------------------------|----------|-------------------------|
|                   | <i>R</i> | <i>P<sub>adj.</sub></i> | <i>R</i> | <i>P<sub>adj.</sub></i> | <i>R</i> | <i>P<sub>adj.</sub></i> |
| IS                | -0.256   | 0.426                   | -0.217   | 0.598                   | -0.024   | 0.955                   |
| IV                | 0.278    | 0.426                   | 0.091    | 0.801                   | -0.083   | 0.955                   |
| RA                | -0.146   | 0.568                   | -0.212   | 0.598                   | -0.025   | 0.955                   |
| L5 onset          | 0.116    | 0.575                   | -0.083   | 0.801                   | -0.183   | 0.955                   |
| M10 onset         | 0.195    | 0.426                   | 0.398    | 0.377                   | -0.02    | 0.955                   |
| L5 activity       | 0.201    | 0.426                   | 0.207    | 0.598                   | 0.028    | 0.955                   |
| M10 activity      | 0.117    | 0.575                   | 0.058    | 0.833                   | 0.014    | 0.955                   |
| L5 onset (SD)     | 0.082    | 0.657                   | -0.196   | 0.598                   | 0.099    | 0.955                   |
| M10 onset (SD)    | 0.217    | 0.426                   | 0.180    | 0.598                   | 0.026    | 0.955                   |
| L5 activity (SD)  | 0.37     | 0.426                   | 0.350    | 0.377                   | 0.14     | 0.955                   |
| M10 activity (SD) | 0.231    | 0.426                   | 0.025    | 0.898                   | 0.056    | 0.955                   |
| RA (SD)           | 0.24     | 0.426                   | 0.139    | 0.707                   | 0.068    | 0.955                   |

Legend as in Supplementary Table 4

**Supplementary Table 9: Discriminant properties of actigraph measure for diagnosis using ROC curve classification analysis**

|                         | HC vs BD |       |       |         |      |      | HC vs BPD |       |       |         |      |      | BD vs BPD |       |       |         |      |      |
|-------------------------|----------|-------|-------|---------|------|------|-----------|-------|-------|---------|------|------|-----------|-------|-------|---------|------|------|
|                         | AUC      | Sens. | Spec. | Cut off | PPV  | NPV  | AUC       | Sens. | Spec. | Cut off | PPV  | NPV  | AUC       | Sens. | Spec. | Cut off | PPV  | NPV  |
| <b>Low IS</b>           | 0.343    | 0.97  | 0.029 | 0.59    | 0.48 | 0.50 | 0.452     | 0.06  | 0.94  | 0.15    | 0.36 | 0.54 | 0.624     | 0.52  | 0.77  | 0.3595  | 0.61 | 0.71 |
| <b>IV</b>               | 0.265    | 0.09  | 0.853 | 1.37    | 0.38 | 0.51 | 0.317     | 0.24  | 0.79  | 1.23    | 0.42 | 0.63 | 0.545     | 0.86  | 0.29  | 0.716   | 0.46 | 0.77 |
| <b>Low RA</b>           | 0.488    | 0.97  | 0.147 | 0.90    | 0.51 | 0.83 | 0.655     | 0.86  | 0.5   | 0.83    | 0.47 | 0.82 | 0.679     | 0.76  | 0.58  | 0.809   | 0.55 | 0.78 |
| <b>L5 onset</b>         | 0.524    | 0.97  | 0.029 | 20:12   | 0.48 | -    | 0.833     | 0.71  | 0.85  | 01:35   | 0.75 | 0.83 | 0.789     | 0.71  | 0.81  | 01:37   | 0.71 | 0.81 |
| <b>M10 onset</b>        | 0.655    | 0.77  | 0.59  | 09:35   | 0.61 | 0.69 | 0.693     | 0.86  | 0.62  | 10:00   | 0.58 | 0.88 | 0.584     | 0.67  | 0.58  | 11:37   | 0.28 | 0.48 |
| <b>L5 activity</b>      | 0.483    | 0.74  | 0.353 | 4.54    | 0.5  | 0.58 | 0.574     | 0.33  | 0.88  | 8.97    | 0.64 | 0.68 | 0.598     | 0.48  | 0.74  | 6.05    | 0.56 | 0.68 |
| <b>Low M10 activity</b> | 0.533    | 0.94  | 0.206 | 89.82   | -    | 0.52 | 0.618     | 0.95  | 0.35  | 68.42   | 0.48 | 0.92 | 0.625     | 0.91  | 0.39  | 59.92   | 0.5  | 0.86 |

AUC determined by inspecting ROC curve. Optimal sensitivity and specificity and resultant cut-off scores determined by calculating the Youden Index which designates the maximum value of sensitivity + specificity - 1 along points of the ROC curve. AUC; area under the curve, Sens.; sensitivity, Spec.; specificity, PPV; positive predictive value, NPV; negative predictive value. Dashed line for PPV or NPV indicates no cases were identified using that cut-off.
